# Supplementary material for: Influence of elevated CO2 on development and food utilization of armyworm Mythimna separata fed on transgenic Bt maize infected by nitrogen-fixing bacteria
Source: PeerJ. 2018 Jul 5;6:e5138. doi: 10.7717/peerj.5138 (PMC6035865; doi:10.7717/peerj.5138)
Supplement: Supplemental Information 1 [file peerj-06-5138-s001.xlsx]

## Sheet: Development indexs
					Larval life-span	Pupation rate	Pupal weight	Pupal duration	Adult longevity	Fecundity
	2016	Bt	A. brasilense	A	24.7143	42.26	0.194544	11.01	6.875	209
			A. chroococcum		24.8095	40.28	0.190994	11.06	6.75	198
			CK		23.82	46.63	0.199104	10.91	6.93333	259
		Xy	A. brasilense	A	20.9611	79.34	0.226652	10.01	7.52917	356
			A. chroococcum		20.746	80.34	0.231646	9.95	7.625	371
			CK		22.6111	74.96	0.220664	10.51	7.32857	324
		Bt	A. brasilense	E	25.1944	35.25	0.190055	11.24	6.625	120
			A. chroococcum		25.2857	31.24	0.180862	11.31	6.65	107
			CK		23.1	47.23	0.20848	10.85	7	275
		Xy	A. brasilense	E	21.8571	65.37	0.221032	10.33	7.2	300
			A. chroococcum		21.625	68.24	0.221456	10.24	7.33333	318
			CK		22.9841	60.36	0.212111	10.62	7.125	281
	2017	Bt	A. brasilense	A	23.8545	43.26	0.191625	10.91	6.5	164
			A. chroococcum		24.0454	41.28	0.18745	10.96	6.495	150
			CK		23.125	47.63	0.197896	10.73	6.58333	181
		Xy	A. brasilense	A	19.9206	80.34	0.218433	9.91	7.45	304
			A. chroococcum		19.0857	81.34	0.224547	9.89	7.58333	323
			CK		21.7361	75.96	0.210565	10.31	7.28571	283
		Bt	A. brasilense	E	24.4889	36.25	0.186537	11.06	6.42857	115
			A. chroococcum		24.8431	32.24	0.179562	11.13	6.05	93
			CK		22.9611	48.23	0.199366	10.64	6.69048	187
		Xy	A. brasilense	E	20.85	66.37	0.211646	10.23	7.11667	256
			A. chroococcum		20.5	69.24	0.217545	10.12	7.22143	275
			CK		22.4857	61.36	0.200545	10.41	7	220
	Larval life-span-CO2 and CV.									Pupation rate-CO2 and CV.										Pupal weight-CO2 and CV.										Pupal duration-CO2 and CV.										Adult longevity-CO2 and CV.
	Larval life-span (day)	aCO2	eCO2							Pupation rate (%)	aCO2	eCO2								Pupal weight (g)	aCO2	eCO2								Pupal duration (day)	aCO2	eCO2								Adult longevity (day)	aCO2	eCO2
	Bt	23.6615	24.7122							Bt	43.5567	38.4067								Bt	0.198602	0.18581								Bt	10.93	11.0383								Bt	6.68944	6.57401
	Xy	20.4234	22.137							Xy	78.7133	65.1567								Xy	0.232084	0.204056								Xy	10.0967	10.325								Xy	7.46696	7.16607
																				SE										SE										SE
	SE									SE										SE										SE										SE
	Larval life-span (day)	aCO2	eCO2							Pupation rate (%)	aCO2	eCO2								Pupal weight (g)	aCO2	eCO2								Pupal duration (day)	aCO2	eCO2								Adult longevity (day)	aCO2	eCO2
	Bt	0.526756	0.403286							Bt	2.95725	2.46128								Bt	0.00443079	0.00612227								Bt	0.114018	0.151985								Bt	0.0910691	0.115957
	Xy	0.358684	0.441837							Xy	2.61735	3.6089								Xy	0.00529931	0.00484548								Xy	0.0941391	0.124671								Xy	0.137607	0.113048
	Larval life-span-azotobacter and CV.									Pupation rate-azotobacter and CV.										Pupal weight-azotobacter and CV.										Pupal duration-azotobacter and CV.										Adult longevity-azotobacter and CV.
	Larval life-span (day)	AB	AC	CK						Pupation rate (%)	AB	AC	CK							Pupal weight (g)	AB	AC	CK							Pupal duration (day)	AB	AC	CK							Adult longevity (day)	AB	AC	CK
	Bt	24.563	24.7459	23.2515						Bt	39.255	36.26	47.43							Bt	0.19069	0.184717	0.201212							Bt	11.055	11.115	10.7825							Bt	6.60714	6.48625	6.80179
	Xy	20.6972	20.2892	22.3543						Xy	72.855	74.79	68.16							Xy	0.219441	0.223798	0.210971							Xy	10.12	10.05	10.4625							Xy	7.32396	7.44077	7.18482
	SE									SE										SE										SE										SE
	Larval life-span (day)	A. brasilense	A. chroococcum	CK						Pupation rate (%)	A. brasilense	A. chroococcum	CK							Pupal weight (g)	A. brasilense	A. chroococcum	CK							Pupal duration (day)	A. brasilense	A. chroococcum	CK							Adult longevity (day)	A. brasilense	A. chroococcum	CK
	Bt	0.556482	0.514949	0.385777						Bt	3.0882	2.25108	1.6733							Bt	0.00333562	0.00542514	0.00388764							Bt	0.108203	0.117535	0.0916515							Bt	0.0961578	0.121757	0.1235
	Xy	0.691935	0.652915	0.323478						Xy	4.08622	5.00976	3.44906							Xy	0.00622642	0.00596474	0.00424888							Xy	0.0935631	0.119792	0.08301							Xy	0.09692	0.094866	0.111196
	Larval life-span-azotobacter and CO2									Pupation rate-azotobacter and CO2										Pupal weight-azotobacter and CO2										Pupal duration-azotobacter and CO2										Adult longevity-azotobacter and CO2
	Larval life-span (day)	AB	AC	CK						Pupation rate (%)	AB	AC	CK							Pupal weight (g)	AB	AC	CK							Pupal duration (day)	AB	AC	CK							Adult longevity (day)	AB	AC	CK
	aCO2	21.7626	21.5717	22.8231						aCO2	61.295	60.81	61.3							aCO2	0.213813	0.213057	0.214659							aCO2	10.31	10.315	10.615							aCO2	7.18854	7.21333	7.13274
	eCO2	23.1976	23.1634	23.8827						eCO2	50.81	50.24	54.295							eCO2	0.197317	0.194857	0.200126							eCO2	10.715	10.7	10.83							eCO2	6.74256	6.71369	6.85387
	SE									SE										SE										SE										SE
	Larval life-span (day)	A. brasilense	A. chroococcum	CK						Pupation rate (%)	A. brasilense	A. chroococcum	CK							Pupal weight (g)	A. brasilense	A. chroococcum	CK							Pupal duration (day)	A. brasilense	A. chroococcum	CK							Adult longevity (day)	A. brasilense	A. chroococcum	CK
	aCO2	0.528646	0.709544	0.477769						aCO2	3.11593	3.13586	3.36652							aCO2	0.00437641	0.0036767	0.0041799							aCO2	0.0958023	0.0863111	0.0809598							aCO2	0.0888026	0.126498	0.108023
	eCO2	0.548236	0.626164	0.427157						eCO2	4.39937	4.36976	2.60256							eCO2	0.0037001	0.00274551	0.00316985							eCO2	0.084531	0.096069	0.0798147							eCO2	0.0748852	0.0905638	0.0852185
	2016											2017
	Larval life-span (day)	aCO2-Bt	aCO2-Xy	eCO2-Bt	eCO2-Xy							Larval life-span (day)	aCO2-Bt	aCO2-Xy	eCO2-Bt	eCO2-Xy
	AB	24.7143	20.9611	25.6944	21.8571							AB	23.8545	19.9206	24.4889	20.85
	AC	24.8095	20.746	25.7857	21.625							AC	24.0454	19.0857	24.8431	20.5
	CK	23.82	22.4111	23.1	22.9841							CK	23.125	21.7361	22.7611	22.4857
	SE											SE
	Larval life-span (day)	aCO2-Bt	aCO2-XIANYU	eCO2-Bt	eCO2-XIANYU							Larval life-span (day)	aCO2-Bt	aCO2-XIANYU	eCO2-Bt	eCO2-XIANYU
	A. brasilense	0.267298	0.17569	0.296066	0.167298							A. brasilense	0.267298	0.17569	0.296066	0.167298
	A. chroococcum	0.388002	0.179999	0.339548	0.188002							A. chroococcum	0.388002	0.179999	0.339548	0.188002
	CK	0.267298	0.27569	0.296066	0.288002							CK	0.267298	0.27569	0.296066	0.288002
	2016											2017
	Pupation rate (%)	aCO2-Bt	aCO2-Xy	eCO2-Bt	eCO2-Xy							Pupation rate (%)	aCO2-Bt	aCO2-Xy	eCO2-Bt	eCO2-Xy
	AB	42.26	77.34	35.25	65.37							AB	43.26	80.34	36.25	67.37
	AC	40.28	80.34	31.24	68.24							AC	41.28	81.34	31.24	69.24
	CK	46.63	72.96	43.23	60.36							CK	47.63	75.96	43.23	61.36
	SE											SE
	Pupation rate (%)	aCO2-Bt	aCO2-XIANYU	eCO2-Bt	eCO2-XIANYU							Pupation rate (%)	aCO2-Bt	aCO2-XIANYU	eCO2-Bt	eCO2-XIANYU
	A. brasilense	1.2673	1.57569	1.39607	1.2673							A. brasilense	1.2673	1.57569	1.39607	1.2673
	A. chroococcum	1.388	1.48	1.04795	1.388							A. chroococcum	1.388	1.48	0.804795	1.388
	CK	1.2673	1.57569	1.39607	1.388							CK	1.2673	1.57569	1.39607	1.388
	2016											2017
	Pupal weight (g)	aCO2-Bt	aCO2-Xy	eCO2-Bt	eCO2-Xy							Pupal weight (g)	aCO2-Bt	aCO2-Xy	eCO2-Bt	eCO2-Xy
	AB	0.194544	0.227652	0.190055	0.221032							AB	0.191625	0.218433	0.186537	0.211646
	AC	0.190994	0.231646	0.180862	0.221456							AC	0.18745	0.224547	0.179562	0.217545
	CK	0.199104	0.220664	0.20848	0.212111							CK	0.197896	0.210565	0.199966	0.200545
	SE											SE
	Pupal weight (g)	aCO2-Bt	aCO2-XIANYU	eCO2-Bt	eCO2-XIANYU							Pupal weight (g)	aCO2-Bt	aCO2-XIANYU	eCO2-Bt	eCO2-XIANYU
	A. brasilense	0.00267298	0.0017569	0.00296066	0.00167298							A. brasilense	0.00267298	0.0017569	0.00296066	0.00167298
	A. chroococcum	0.0012388	0.00179999	0.00395475	0.00188002							A. chroococcum	0.0012388	0.00179999	0.00195475	0.00188002
	CK	0.00267298	0.0027569	0.00296066	0.00288002							CK	0.00267298	0.0027569	0.00296066	0.00288002
	2016											2017
	Pupal duration (day)	aCO2-Bt	aCO2-Xy	eCO2-Bt	eCO2-Xy							Pupal duration (day)	aCO2-Bt	aCO2-Xy	eCO2-Bt	eCO2-Xy
	AB	11.01	10.01	11.24	10.33							AB	10.91	9.91	11.06	10.23
	AC	11.06	9.95	11.31	10.24							AC	10.96	9.89	11.13	10.12
	CK	10.91	10.51	10.81	10.62							CK	10.73	10.31	10.64	10.41
	SE											SE
	Pupal duration (day)	aCO2-Bt	aCO2-XIANYU	eCO2-Bt	eCO2-XIANYU							Pupal duration (day)	aCO2-Bt	aCO2-XIANYU	eCO2-Bt	eCO2-XIANYU
	A. brasilense	0.0672977	0.0756897	0.0960661	0.0672977							A. brasilense	0.0967298	0.0356897	0.0606614	0.0672977
	A. chroococcum	0.0880017	0.0799985	0.0547529	0.0580017							A. chroococcum	0.0880017	0.0299985	0.0547529	0.0480017
	CK	0.0672977	0.0756897	0.0696066	0.0880017							CK	0.0672977	0.0756897	0.0696066	0.0380017
	2016											2017
	Adult longevity (day)	aCO2-Bt	aCO2-Xy	eCO2-Bt	eCO2-Xy							Adult longevity (day)	aCO2-Bt	aCO2-Xy	eCO2-Bt	eCO2-Xy
	AB	6.8175	7.52917	6.625	7.2							AB	6.5	7.45	6.32857	7.11667
	AC	6.75	7.625	6.65	7.33333							AC	6.495	7.58333	6.05	7.22143
	CK	6.90333	7.32857	7	7.125							CK	6.58333	7.28571	6.69048	7
	SE											SE
	Adult longevity (day)	aCO2-Bt	aCO2-XIANYU	eCO2-Bt	eCO2-XIANYU							Adult longevity (day)	aCO2-Bt	aCO2-XIANYU	eCO2-Bt	eCO2-XIANYU
	A. brasilense	0.0672977	0.0756897	0.0960661	0.0672977							A. brasilense	0.0967298	0.0356897	0.0606614	0.0672977
	A. chroococcum	0.0880017	0.0799985	0.0547529	0.0880017							A. chroococcum	0.0880017	0.0299985	0.0247529	0.0480017
	CK	0.0672977	0.0756897	0.0696066	0.0880017							CK	0.0672977	0.0756897	0.0696066	0.0380017
	2016											2017
	Fecundity (eggs per female)	aCO2-Bt	aCO2-Xy	eCO2-Bt	eCO2-Xy							Fecundity (eggs per female)	aCO2-Bt	aCO2-Xy	eCO2-Bt	eCO2-Xy
	AB	209	356	120	300							AB	160	304	115	256
	AC	198	371	107	318							AC	150	323	93	275
	CK	259	324	275	281							CK	177	283	187	220
	SE											SE
	Fecundity (eggs per female)	aCO2-Bt	aCO2-XIANYU	eCO2-Bt	eCO2-XIANYU							Fecundity (eggs per female)	aCO2-Bt	aCO2-XIANYU	eCO2-Bt	eCO2-XIANYU
	A. brasilense	16.0031	13.7406	14.4334	16.2973							A. brasilense	16.0031	13.7406	13.4334	16.2973
	A. chroococcum	12.5458	13.4661	9.55645	14.7492							A. chroococcum	8.5458	14.4661	7.55645	14.7492
	CK	12.6006	10.4733	13.5495	12.7							CK	12.6006	15.4733	12.5495	12.7
[truncated: 4 more columns]

## Sheet: Food utilization indexs
					RGR (mg/g/d)	RCR (mg/g/d)	AD (%)	ECD (%)	ECI (%)
	2016	Bt	A. brasilense	A	80.9249	1484.23	54.4505	10.0133	5.4523
			A. chroococcum		80.6142	1516.02	55.3044	9.61495	5.31749
			CK		83.9631	1400.64	50.689	11.8263	5.99463
		XIANYU	A. brasilense	A	95.4148	1276.88	49.9595	14.9571	7.47249
			A. chroococcum		96.404	1196.26	48.1769	16.7275	8.05879
			CK		88.4521	1289.49	51.7921	13.2443	6.85949
		Bt	A. brasilense	E	79.3826	1696.47	59.2197	7.90157	4.67929
			A. chroococcum		79.096	1797.17	59.7641	7.36419	4.40114
			CK		86.5801	1365.44	49.5365	12.8003	6.34083
		XIANYU	A. brasilense	E	91.5033	1301.87	51.1232	13.7484	7.02861
			A. chroococcum		92.4855	1269.72	49.7799	14.6323	7.28395
			CK		87.0166	1324.55	51.2202	12.826	6.56951
	2017	Bt	A. brasilense	A	83.8415	1714.05	58.1273	8.415	4.89142
			A. chroococcum		83.1758	1770.66	58.918	7.97285	4.69744
			CK		86.4865	1614.92	55.3954	9.66772	5.35547
		XIANYU	A. brasilense	A	100.398	1537.6	54.1062	12.0681	6.52957
			A. chroococcum		104.79	1522.46	53.258	12.9238	6.88297
			CK		92.0128	1491.44	53.2652	11.5824	6.16938
		Bt	A. brasilense	E	81.6697	1846.27	60.059	7.36524	4.42349
			A. chroococcum		80.5054	1897.81	60.4308	7.01962	4.24201
			CK		87.1038	1532.59	51.8401	10.9634	5.68345
		XIANYU	A. brasilense	E	95.9233	1531.59	53.4639	11.7144	6.26299
			A. chroococcum		97.561	1503.52	53.5077	12.1269	6.48884
			CK		88.9454	1579.97	54.939	10.2469	5.62956
	RGR-CO2 and CV.										RCR-CO2 and CV.										AD-CO2 and CV.										ECD-CO2 and CV.										ECI-CO2 and CV.
	RGR	aCO2	eCO2								RCR	aCO2	eCO2								AD	aCO2	eCO2								ECD	aCO2	eCO2								ECI	aCO2	eCO2
	Bt	83.1677	81.3896								Bt	1583.42	1689.29								Bt	55.4808	56.8084								Bt	9.58502	8.90239								Bt	5.28479	4.9617
	Xy	96.2454	92.2392								Xy	1385.69	1418.54								Xy	51.7596	52.339								Xy	13.5839	12.5492								Xy	6.99545	6.54391
	SE										SE										SE										SE										SE
	RGR	aCO2	eCO2								RCR	aCO2	eCO2								AD	aCO2	eCO2								ECD	aCO2	eCO2								ECI	aCO2	eCO2
	Bt	2.17493	2.57049								Bt	32.0612	24.5727								Bt	0.928462	0.812553								Bt	0.555176	0.496536								Bt	0.245557	0.185141
	Xy	1.82461	2.0155								Xy	38.286	34.6522								Xy	0.845633	0.932367								Xy	0.592992	0.551106								Xy	0.167659	0.215833
	RGR-azotobacter and CV.										RCR-azotobacter and CV.										AD-azotobacter and CV.										ECD-azotobacter and CV.										ECI-azotobacter and CV.
	RGR	A. brasilense	A. chroococcum	CK							RCR	A. brasilense	A. chroococcum	CK							AD	A. brasilense	A. chroococcum	CK							ECD	A. brasilense	A. chroococcum	CK							ECI	A. brasilense	A. chroococcum	CK
	Bt	81.4547	80.8479	86.0334							Bt	1685.26	1745.42	1478.4							Bt	57.9642	58.6043	53.8653							Bt	8.42378	7.9929	11.3144							Bt	4.86162	4.66452	5.84359
	Xy	95.8099	97.8102	89.1067							Xy	1411.98	1372.99	1421.36							Xy	52.1632	51.1806	52.8041							Xy	13.122	14.1026	11.9749							Xy	6.82341	7.17864	6.30698
	SE										SE										SE										SE										SE
	RGR	A. brasilense	A. chroococcum	CK							RCR	A. brasilense	A. chroococcum	CK							AD	A. brasilense	A. chroococcum	CK							ECD	A. brasilense	A. chroococcum	CK							ECI	A. brasilense	A. chroococcum	CK
	Bt	1.85449	1.69903	1.40668							Bt	29.7677	22.4427	16.0183							Bt	0.472322	0.654019	0.534369							Bt	0.430764	0.509439	0.297472							Bt	0.237793	0.247446	0.164219
	Xy	1.64099	2.13533	1.21031							Xy	31.9647	24.5989	17.6368							Xy	0.498093	0.62775	0.363681							Xy	0.511292	0.682643	0.271014							Xy	0.25366	0.267057	0.253292
	RGR-azotobacter and CO2										RCR-azotobacter and CO2										AD-azotobacter and CO2										ECD-azotobacter and CO2										ECI-azotobacter and CO2
	RGR	A. brasilense	A. chroococcum	CK							RCR	A. brasilense	A. chroococcum	CK							AD	A. brasilense	A. chroococcum	CK							ECD	A. brasilense	A. chroococcum	CK							ECI	A. brasilense	A. chroococcum	CK
	aCO2	93.1449	94.2461	86.7286							aCO2	1479.19	1485.35	1429.12							aCO2	52.9143	53.1609	51.7854							aCO2	12.3634	12.8098	12.0802							aCO2	6.63644	6.78917	6.29474
	eCO2	85.1197	85.812	84.0115							eCO2	1614.05	1637.05	1470.64							eCO2	56.7665	57.0707	52.884							eCO2	9.28576	9.1824	11.2092							eCO2	5.10399	5.09859	5.75584
	标准误										标准误										标准误										标准误										标准误
	RGR	A. brasilense	A. chroococcum	CK							RCR	A. brasilense	A. chroococcum	CK							AD	A. brasilense	A. chroococcum	CK							ECD	A. brasilense	A. chroococcum	CK							ECI	A. brasilense	A. chroococcum	CK
	aCO2	1.2673	1.57569	1.39607							aCO2	18.0206	23.4224	17.9782							aCO2	0.402283	0.483969	0.403502							aCO2	0.412291	0.45907	0.470522							aCO2	0.14713	0.222726	0.183173
	eCO2	1.388	1.48	1.04795							eCO2	23.3642	25.6574	14.632							eCO2	0.360916	0.51197	0.573094							eCO2	0.566041	0.471867	0.307955							eCO2	0.253309	0.173512	0.147098
	2016												2016
	RGR	aCO2-Bt	aCO2-XIANYU	eCO2-Bt	eCO2-XIANYU								RGR	aCO2-Bt	aCO2-XIANYU	eCO2-Bt	eCO2-XIANYU
	A. brasilense	81.9249	95.4148	79.3826	91.5033								A. brasilense	83.8415	97.3984	81.6697	93.9233
	A. chroococcum	81.6142	96.404	79.096	92.4855								A. chroococcum	83.1758	98.7904	80.5054	95.561
	CK	83.6631	89.4521	85.2801	87.0166								CK	85.4865	93.0128	87.1038	88.9454
	SE												SE
	RGR	aCO2-Bt	aCO2-XIANYU	eCO2-Bt	eCO2-XIANYU								RGR	aCO2-Bt	aCO2-XIANYU	eCO2-Bt	eCO2-XIANYU
	A. brasilense	1.2673	1.57569	1.39607	1.2673								A. brasilense	1.2673	1.57569	1.39607	1.2673
	A. chroococcum	1.388	1.48	1.04795	1.388								A. chroococcum	1.388	1.48	1.04795	1.388
	CK	1.2673	1.57569	1.39607	1.388								CK	1.2673	1.57569	1.39607	1.388
		9	2	11	4									9	2	11	4
		10	1	12	3									10	1	12	3
	2016	8	5	7	6								2017	8	5	7	6
	RCR	aCO2-Bt	aCO2-XIANYU	eCO2-Bt	eCO2-XIANYU								RCR	aCO2-Bt	aCO2-XIANYU	eCO2-Bt	eCO2-XIANYU
	A. brasilense	1574.23	1229.72	1726.47	1289.49								A. brasilense	1634.05	1231.59	1796.27	1337.6
	A. chroococcum	1616.02	1196.26	1797.17	1276.88								A. chroococcum	1670.66	1203.52	1857.81	1322.46
	CK	1510.64	1361.87	1465.44	1414.55								CK	1574.92	1381.44	1532.59	1449.97
	SE												SE
	RCR	aCO2-Bt	aCO2-XIANYU	eCO2-Bt	eCO2-XIANYU								RCR	aCO2-Bt	aCO2-XIANYU	eCO2-Bt	eCO2-XIANYU
	A. brasilense	16.0031	13.7406	23.4334	26.2973								A. brasilense	16.0031	13.7406	23.4334	26.2973
	A. chroococcum	26.5458	23.4661	15.5564	14.7492								A. chroococcum	26.5458	23.4661	15.5564	14.7492
	CK	12.6006	25.4733	23.5495	12.7								CK	12.6006	25.4733	23.5495	12.7
	2016												2017
	AD	aCO2-Bt	aCO2-XIANYU	eCO2-Bt	eCO2-XIANYU								AD	aCO2-Bt	aCO2-XIANYU	eCO2-Bt	eCO2-XIANYU
	A. brasilense	54.4505	47.7595	58.2197	48.7232								A. brasilense	57.1273	49.7046	59.059	51.1062
	A. chroococcum	55.3044	47.1769	59.7641	48.3799								A. chroococcum	57.918	49.2077	60.0431	50.6258
	CK	52.989	49.0921	51.5365	50.2202								CK	55.7954	51.0652	54.0401	52.539
	SE												SE
	AD	aCO2-Bt	aCO2-XIANYU	eCO2-Bt	eCO2-XIANYU								AD	aCO2-Bt	aCO2-XIANYU	eCO2-Bt	eCO2-XIANYU
	A. brasilense	0.260031	0.337406	0.234334	0.326297								A. brasilense	0.260031	0.337406	0.234334	0.326297
	A. chroococcum	0.365458	0.234661	0.415556	0.247492								A. chroococcum	0.365458	0.234661	0.415556	0.247492
	CK	0.226006	0.254733	0.335495	0.27								CK	0.226006	0.254733	0.235495	0.27
	2016												2017
	ECD	aCO2-Bt	aCO2-XIANYU	eCO2-Bt	eCO2-XIANYU								ECD	aCO2-Bt	aCO2-XIANYU	eCO2-Bt	eCO2-XIANYU
	A. brasilense	10.0133	15.9571	7.90157	13.7484								A. brasilense	8.415	13.0681	7.36524	11.7144
	A. chroococcum	9.61495	16.7275	7.36419	14.6323								A. chroococcum	7.97285	13.9238	7.01962	12.1269
	CK	10.9263	13.3443	11.8003	12.526								CK	9.36772	11.6824	10.1469	10.8634
	SE												SE
	ECD	aCO2-Bt	aCO2-XIANYU	eCO2-Bt	eCO2-XIANYU								ECD	aCO2-Bt	aCO2-XIANYU	eCO2-Bt	eCO2-XIANYU
	A. brasilense	0.260031	0.337406	0.234334	0.226297								A. brasilense	0.260031	0.337406	0.234334	0.226297
	A. chroococcum	0.265458	0.434661	0.155564	0.347492								A. chroococcum	0.265458	0.434661	0.155564	0.347492
	CK	0.326006	0.254733	0.435495	0.27								CK	0.326006	0.254733	0.435495	0.27
	2016												2017
	ECI	aCO2-Bt	aCO2-XIANYU	eCO2-Bt	eCO2-XIANYU								ECI	aCO2-Bt	aCO2-XIANYU	eCO2-Bt	eCO2-XIANYU
	A. brasilense	5.3523	7.67249	4.57929	7.02861								A. brasilense	4.79142	6.62957	4.32349	6.26299
	A. chroococcum	5.21749	8.05879	4.37114	7.28395								A. chroococcum	4.69744	6.98297	4.14201	6.48884
	CK	5.79463	6.95949	6.14083	6.46951								CK	5.05547	6.16938	5.38345	5.62956
	SE												SE
	ECI	aCO2-Bt	aCO2-XIANYU	eCO2-Bt	eCO2-XIANYU								ECI	aCO2-Bt	aCO2-XIANYU	eCO2-Bt	eCO2-XIANYU
	A. brasilense	0.160031	0.137406	0.234334	0.226297								A. brasilense	0.160031	0.137406	0.234334	0.226297
	A. chroococcum	0.265458	0.234661	0.155564	0.147492								A. chroococcum	0.265458	0.234661	0.155564	0.147492
	CK	0.126006	0.254733	0.235495	0.17								CK	0.126006	0.154733	0.195495	0.127

## Sheet: Figure 1-food utilization
						2016					2017
